# Supplementary material for: Genome, Environment, Microbiome and Metabolome in Autism (GEMMA) Study Design: Biomarkers Identification for Precision Treatment and Primary Prevention of Autism Spectrum Disorders by an Integrated Multi-Omics Systems Biology Approach
Source: MDPI journal article supplement (doi:10.3390/brainsci10100743), 2020-10-16
Supplement: s1 [file s1]

**Table S1.** Information that will be collected from the enrolled participant during the project.

[illegible]



**Table S3.** Psychiatric evaluation of the enrolled participants.

| Months                                                                                                                             | Enrollment<br>Visit<br>0-<6 MTHS | Family<br>Contact<br>9 MTHS | Clinic Visit<br>12 MTHS | Family<br>Contact<br>15 MTHS | Clinic Visit<br>18 MTHS | Family<br>Contact<br>21 MTHS | Clinic Visit<br>24 MTHS | Family<br>Contact<br>27 MTHS | Clinic Visit<br>30 MTHS | Family<br>Contact<br>33 MTHS | End of<br>Study<br>Visit<br>36 MTHS |
|------------------------------------------------------------------------------------------------------------------------------------|----------------------------------|-----------------------------|-------------------------|------------------------------|-------------------------|------------------------------|-------------------------|------------------------------|-------------------------|------------------------------|-------------------------------------|
| <ul style="list-style-type: none"> <li>• Apgar score</li> <li>• possible peri-natal distress</li> <li>• prematurity</li> </ul>     |                                  |                             |                         |                              |                         |                              |                         |                              |                         |                              |                                     |
| Infant medical history/status including:                                                                                           |                                  |                             |                         |                              |                         |                              |                         |                              |                         |                              |                                     |
| <ul style="list-style-type: none"> <li>• infections</li> <li>• onset of food intolerance</li> <li>• chronic stress etc.</li> </ul> | X                                | X                           | X                       | X                            | X                       | X                            | X                       | X                            | X                       | X                            | X                                   |
| Online Questionnaire to be completed by parents (monthly up to 12 months age) then 3 months thereafter                             | X                                | X                           | X                       | X                            | X                       | X                            | X                       | X                            | X                       | X                            | X                                   |
| Aberrant Behavior Checklist                                                                                                        |                                  | X                           | X                       | X                            | X                       | X                            | X                       | X                            | X                       | X                            | X                                   |
| ADOS-Toddler                                                                                                                       |                                  |                             | X                       |                              | X                       |                              | X                       |                              | X                       |                              | X                                   |
| MSEL, VABS                                                                                                                         |                                  |                             |                         |                              |                         |                              | X                       |                              |                         |                              | X                                   |
| CGI-5                                                                                                                              |                                  |                             | X                       |                              | X                       |                              | X                       |                              | X                       |                              | X                                   |
| CG-I                                                                                                                               |                                  |                             | X                       |                              | X                       |                              | X                       |                              | X                       |                              | X                                   |
| Infant concomitant medication review including vaccinations and antibiotics (online questionnaire 3 months)                        | X                                |                             | X                       | X                            | X                       | X                            | X                       | X                            | X                       | X                            | X                                   |
| Infant dietary Review (online questionnaire at 3 months)                                                                           | X                                |                             | X                       | X                            | X                       | X                            | X                       | X                            | X                       | X                            | X                                   |
| Physical Examination including height, weight                                                                                      | X                                |                             | X                       | X                            | X                       | X                            | X                       |                              |                         |                              | X                                   |
